# Supplementary material
Source: HighWire-hosted journal article supplement (https://erj.ersjournals.com/content/57/6/2003764)
Supplement: inline-supplementary-material-2 [file inline-supplementary-material-2.pdf]

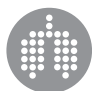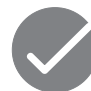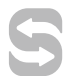

SHAREABLE PDF

# TNF-mediated alveolar macrophage necroptosis drives disease pathogenesis during respiratory syncytial virus infection

Leonardo Duarte Santos<sup>1</sup>, Krist Helen Antunes<sup>1</sup>, Stéfanie Primon Muraro<sup>1,2,9</sup>, Gabriela Fabiano de Souza<sup>1,2,9</sup>, Amanda Gonzalez da Silva<sup>1</sup>, Jaqueline de Souza Felipe<sup>3</sup>, Larissa Cardoso Zanetti<sup>4</sup>, Rafael Sanguinetti Czepielewski<sup>1,5</sup>, Karen Magnus<sup>1</sup>, Marcelo Scotta<sup>6</sup>, Rita Mattiello<sup>6</sup>, Fabio Maito<sup>7</sup>, Ana Paula Duarte de Souza<sup>1</sup>, Ricardo Weinlich<sup>4</sup>, Marco Aurélio Ramirez Vinolo<sup>3</sup> and Bárbara Nery Porto <sup>1,8</sup>

**Affiliations:** <sup>1</sup>Laboratory of Clinical and Experimental Immunology, Infant Center, School of Life and Health Science, Pontifical Catholic University of Rio Grande do Sul, Porto Alegre, Brazil. <sup>2</sup>Laboratory of Emerging Viruses, Dept of Genetics, Evolution, Microbiology and Immunology, Institute of Biology, University of Campinas, Campinas, Brazil. <sup>3</sup>Laboratory of Immunoinflammation, Dept of Genetics, Evolution, Microbiology and Immunology, Institute of Biology, University of Campinas, Campinas, Brazil. <sup>4</sup>Hospital Israelita Albert Einstein, São Paulo, Brazil. <sup>5</sup>Dept of Pathology and Immunology, Washington University School of Medicine, St. Louis, MO, USA. <sup>6</sup>Infant Center, School of Life and Health Science, Pontifical Catholic University of Rio Grande do Sul, Porto Alegre, Brazil. <sup>7</sup>Laboratory of Oral Pathology, Health Science School, Pontifical Catholic University of Rio Grande do Sul, Porto Alegre, Brazil. <sup>8</sup>Program in Translational Medicine, The Hospital for Sick Children, Toronto, ON, Canada. <sup>9</sup>These authors contributed equally to this work.

**Correspondence:** Bárbara N. Porto, Program in Translational Medicine, The Hospital for Sick Children, 686 Bay Street, Toronto, Ontario M5G 1X8, Canada. E-mail: barbara.porto@sickkids.ca

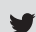

@ERSpublications

**RIPK1-, RIPK3- and MLKL-dependent alveolar macrophage necroptosis triggered by RSV infection is mediated by autocrine TNF and harmful to viral clearance. Alveolar macrophage necroptosis may drive RSV disease pathogenesis.** <https://bit.ly/3fS34uw>

**Cite this article as:** Santos LD, Antunes KH, Muraro SP, *et al.* TNF-mediated alveolar macrophage necroptosis drives disease pathogenesis during respiratory syncytial virus infection. *Eur Respir J* 2021; 57: 2003764 [https://doi.org/10.1183/13993003.03764-2020].

This single-page version can be shared freely online.

**ABSTRACT** Respiratory syncytial virus (RSV) is the major cause of acute bronchiolitis in infants under 2 years old. Necroptosis has been implicated in the outcomes of respiratory virus infections. We report that RSV infection triggers necroptosis in primary mouse macrophages and human monocytes in a RIPK1-, RIPK3- and MLKL-dependent manner. Moreover, necroptosis pathways are harmful to RSV clearance from alveolar macrophages. Additionally, *Ripk3*<sup>-/-</sup> mice were protected from RSV-induced weight loss and presented with reduced viral loads in the lungs.

Alveolar macrophage depletion also protected mice from weight loss and decreased lung RSV virus load. Importantly, alveolar macrophage depletion abolished the upregulation of *Ripk3* and *Mlkl* gene expression induced by RSV infection in the lung tissue.

Autocrine tumor necrosis factor (TNF)-mediated RSV-triggered macrophage necroptosis and necroptosis pathways were also involved in TNF secretion even when macrophages were committed to cell death, which can worsen lung injury during RSV infection. In line, *Tnfr1*<sup>-/-</sup> mice had a marked decrease in *Ripk3* and *Mlkl* gene expression and a sharp reduction in the numbers of necrotic alveolar macrophages in the lungs. Finally, we provide evidence that elevated nasal levels of TNF are associated with disease severity in infants with RSV bronchiolitis.

We propose that targeting TNF and/or the necroptotic machinery may be valuable therapeutic approaches to reduce the respiratory morbidity caused by RSV infection in young children.
